# Supplementary material for: A comparative analysis of vigilance in birds
Source: Springer Nature journal article supplement (doi:10.1007/s10682-010-9358-5), 2010-01-28
Supplement: MOESM1 [file 10682_2010_9358_MOESM1_ESM.doc]

Appendix. Ecological factors influencing vigilance among species of foraging birds. Data are sorted by year of study.

| Species | Body mass (g) | Sample size | Maximum group size | Diet | Vigilance alone (%) | Asymptotic vigilance (%) | % time spent in agonistic activities | References |
| --- | --- | --- | --- | --- | --- | --- | --- | --- |
| *Anser albifrons* | 2075 |  | 100 | vegetation |  | 3 |  | Owen 1972 |
| *Sturnus vulgaris* | 87.6 | 236 | 10 | seeds | 47.00 | 12 |  | Powell 1974 |
| *Branta leucopsis* | 1550 |  | 200 | vegetation |  | 10.10 | 0.3 | Ebbinge et al. 1975 |
| *Branta leucopsis* | 1788 | 28 | 2000 | vegetation | 33.00 | 6.00 |  | Drent and Swiestra 1977 |
| *Anser albifrons* | 2075 | 42 | 1061 | vegetation | 65.00 | 5 |  | Lazarus and Inglis 1978 |
| *Anser brachyrhynchus* | 2770 | 2235 | 33 | vegetation | 5.00 | 0 |  | Lazarus 1978 |
| *Branta bernicla* | 1370 | 43 | 600 | vegetation | 25.00 | 10.00 |  | Inglis and Isaacson 1978 |
| *Junco phaeonotus* | 20.4 | 97 | 10 | seeds | 28.10 | 10.00 |  | Caraco 1979 |
| *Numenius arquata* | 742 | 42 | 28 | invertebrates | 16.20 | 3.00 |  | Abramson 1979 |
| *Junco phaeonotus* | 20.4 | 267 | 7 | seeds | 66.00 | 34 | 9 | Caraco et al. 1980 |
| *Passer domesticus* | 28 | 98 | 50 | seeds |  |  | 6 | Barnard 1980 |
| *Passer domesticus* | 28 | 37 | 4 | seeds | 62.00 | 47 |  | McVean and Haddlesey 1980 |
| *Struthio camelus* | 111000 | 70 | 4 | vegetation | 34.90 | 14 |  | Bertram 1980 |
| *Sturnus vulgaris* | 87.6 | 39 | 225 | invertebrates | 27.30 | 2 |  | Jennings and Evans 1980 |
| *Branta bernicla* | 1370 | 64 | 1800 | vegetation | 25.00 | 9 |  | Inglis and Lazarus 1981 |
| *Corvus frugilegus* | 489 | 139 | 30 | invertebrates | 56.00 | 12 |  | Waite 1981 |
| *Chionis minor* | 625 | 75 | 30 | invertebrates | 8.00 | 3 |  | Burger 1982 |
| *Anas platyrhynchos* | 1082 |  | 1000 | seeds |  | 10 | 1 | Jorde et al. 1983 |
| *Passer domesticus* | 28 | 5 | 6 | seeds |  |  |  | Elcavage and Caraco 1983 |
| *Passer domesticus* | 28 | 57 | 4 | seeds | 80.67 | 38.00 | 1.4 | Studd et al. 1983 |
| *Anas strepera* | 968 |  | 100 | vegetation |  | 11.1 | 0.5 | Paulus 1984 |
| *Eudocimus albus* | 1036 | 39 | 78 | invertebrates |  | 5.7 |  | Bildstein 1983 |
| *Passer domesticus* | 28 | 541 | 4 | seeds |  |  |  | Elgar et al. 1984 |
| *Picoides pubescens* | 27.5 | 160 | 4 | invertebrates | 11.10 |  |  | Sullivan 1984 |
| *Streptopelia risoria* | 152 | 22 | 6 | seeds |  |  |  | Lendrem 1984 |
| *Cyanistes caeruleus* | 11.1 | 10 | 5 | seeds |  | 12.00 |  | Hegner 1985 |
| *Haliaeetus leucocephalus* | 4130 | 110 | 14 | carrion |  | 40 |  | Knight and Knight 1986 |
| *Anas americana* | 792 |  | 15 | vegetation |  | 4 | 0.9 | Turnbull and Baldassare 1987 |
| *Carduelis carduelis* | 16 |  | 1 | seeds | 68.00 |  |  | Glück 1987 |
| *Corcorax melanorhamphos* | 364 | 62 | 33 | seeds |  | 7.00 |  | Heinsohn 1987 |
| *Eudocimus albus* | 1036 | 25 | 15 | invertebrates | 75.00 | 18.00 |  | Petit and Bildstein 1987 |
| *Fringilla coelebs* | 21.9 | 196 | 11 | seeds |  | 60 |  | Beveridge and Deag 1987 |
| *Grus americana* | 7300 |  | 7 | invertebrates |  | 6.30 |  | Hunt 1987 |
| *Passer domesticus* | 28 | 75 | 4 | seeds | 52.00 | 25.00 | 1 | Lima 1987 |
| *Passer domesticus* | 28 | 281 | 10 | seeds |  | 39.00 |  | Beveridge and Deag 1987 |
| *Plocepasser mahali* | 44 | 49 | 4 | mixed |  | 16.5 |  | Ferguson 1987 |
| *Poecile montana* | 11.1 | 2064 | 4 | seeds | 41.00 | 34.00 | 1 | Ekman 1987 |
| *Sturnus vulgaris* | 87.6 | 55 | 14 | seeds |  | 25 |  | Beveridge and Deag 1987 |
| *Anas fulvigula* | 1043 | 1061 | 10 | vegetation |  | 4.9 | 0.7 | Paulus 1988 |
| *Calidris alpina* | 55.4 | 91 | 7 | invertebrates | 30.00 | 5 |  | Redpath 1988 |
| *Chen caerulescens* | 2744 |  | 14500 | seeds |  | 10.3 | 0 | Gauthier et al. 1988 |
| *Eolophus roseicapilla* | 354 | 199 | 50 | seeds | 49.00 | 12 |  | Westcott and Cockburn 1988 |
| *Grus canadensis* | 3350 | 128 | 1000 | mixed | 1.58 |  | 0.4 | Tacha 1989 |
| *Poecile montana* | 11.1 | 451 | 4 | mixed |  | 28.00 | 2 | Hogstad 1988 |
| *Psephotus haematonotus* | 61.4 | 159 | 30 | seeds | 56.00 | 11 |  | Westcott and Cockburn 1988 |
| *Struthio camelus* | 111000 | 159 | 10 | vegetation | 43.00 | 40 |  | Burger and Gochfeld 1988 |
| *Calidris melanotus* | 97.8 |  | 5 | invertebrates |  | 14.8 | 7.3 | Young 1989 |
| *Calidris pusilla* | 27.5 |  | 15 | invertebrates |  | 2.70 | 2.4 | Young 1989 |
| *Limnodromus scolopaceus* | 100 |  | 9 | invertebrates |  | 1.88 | 1.1 | Young 1989 |
| *Tringa flavipes* | 77.5 |  | 8 | invertebrates |  | 9.20 | 2.6 | Young 1989 |
| *Chenonetta jubata* | 815 | 25 | 280 | vegetation |  | 13 |  | Briggs 1990 |
| *Ciconia ciconia* | 3571 | 64 | 40 | invertebrates | 40.00 | 15.00 | 0.2 | Carrascal et al. 1990 |
| *Calidris alba* | 57 | 117 | 11 | invertebrates |  | 3.50 | 0.2 | Burger and Gochfeld 1991a |
| *Cyanistes caeruleus* | 10.1 | 14 | 1 | seeds | 31.30 |  |  | Moreno and Carrascal 1991 |
| *Larus atricilla* | 327 | 279 | 300 | invertebrates |  | 2.8 | 1 | Burger and Gochfeld 1991b |
| *Lophophanes cristatus* | 11.4 | 29 | 1 | seeds | 38.00 |  |  | Moreno and Carrascal 1991 |
| *Parus major* | 18.9 | 37 | 1 | seeds | 30.30 |  |  | Moreno and Carrascal 1991 |
| *Periparus ater* | 9.2 | 31 | 1 | seeds | 29.50 |  |  | Moreno and Carrascal 1991 |
| *Pica pica* | 221 | 113 | 3 | mixed | 32.80 | 22.9 |  | Diaz and Asensio 1991 |
| *Sitta europaea* | 22.6 | 49 | 1 | seeds | 28.20 |  |  | Moreno and Carrascal 1991 |
| *Anser albifrons* | 2393 | 163 | 100 | vegetation |  | 29.70 |  | Ely 1992 |
| *Branta bernicla* | 1760 | 33 | 1000 | vegetation |  | 5 | 1 | Black et al. 1992 |
| *Calidris alpina* | 55.4 | 300 | 100 | invertebrates |  | <1% | 1 | Mouritsen 1992 |
| *Chen caerulescens* | 2744 | 360 | 7117 | vegetation |  | 5 | 1 | Bélanger and Bédard 1992 |
| *Lophophanes cristatus* | 11.4 | 27 | 1 | seeds | 34.30 |  |  | Carrascal and Moreno 1992 |
| *Periparus ater* | 9.2 | 27 | 1 | seeds | 27.80 |  |  | Carrascal and Moreno 1992 |
| *Phasianus colchicus* | 1317 | 47 | 10 | seeds | 97.30 | 79.30 |  | Milligan and Brigham 1992 |
| *Phoenicopterus ruber ruber* | 3540 | 887 | 3500 | vegetation |  | 1.1 | 4.9 | Schmitz and Baldassarre 1992 |
| *Sitta europaea* | 22.6 | 28 | 1 | seeds | 34.80 |  |  | Carrascal and Moreno 1992 |
| *Anser anser* | 3509 | 6 | 140 | seeds |  | 5.00 |  | Kotrschal et al. 1993 |
| *Grus grus* | 5500 | 394 | 10 | seeds |  | 18.00 | 0.5 | Alonso and Alonso 1993 |
| *Pica pica* | 189 | 91 | 12 | carrion | 32.00 | 71.00 |  | McKinstry and Knight 1993 |
| *Anas crecca crecca* | 320 | 157 | 8 | vegetation | 37.00 | 30 |  | Pöysä 1994 |
| *Ciconia ciconia* | 3571 | 167 | 26 | invertebrates |  | 17.5 |  | Alonso et al. 1994 |
| *Corvus corone corone* | 570 | 1203 | 17 | seeds | 20.00 | 3.70 |  | Saino 1994 |
| *Grus canadensis* | 3350 | 1250 | 5 | mixed |  | 16.5 | 0.2 | Sparling and Krapu 1994 |
| *Arenaria interpres* | 134 | 9 | 4 | invertebrates |  | 6.46 |  | Barbosa 1995 |
| *Calidris alba* | 57 | 23 | 59 | invertebrates |  | 0.90 |  | Barbosa 1995 |
| *Calidris alpina* | 55.4 | 96 | 215 | invertebrates |  | 2.73 |  | Barbosa 1995 |
| *Calidris minuta* | 21.1 | 26 | 46 | invertebrates |  | 1.48 |  | Barbosa 1995 |
| *Charadrius alexandrinus* | 42.3 | 23 | 28 | invertebrates |  | 6.53 |  | Barbosa 1995 |
| *Charadrius hiaticula* | 63.3 | 5 | 14 | invertebrates |  | 3.33 |  | Barbosa 1995 |
| *Coccothraustes vespertinus* | 55.7 | 1472 | 10 | seeds | 37.00 | 15 |  | Bekoff 1995 |
| *Gallinago gallinago* | 97 | 5 | 9 | invertebrates |  | 13.7 |  | Barbosa 1995 |
| *Haematopus ostralegus* | 526 | 8 | 19 | invertebrates |  | 8.8 |  | Barbosa 1995 |
| *Himantopus himantopus* | 161 | 24 | 13 | invertebrates |  | 3.55 |  | Barbosa 1995 |
| *Junco hyemalis* | 19.3 | 117 | 6 | seeds |  |  |  | Lima 1995 |
| *Limosa lapponica* | 309 | 10 | 173 | invertebrates |  | 3.45 |  | Barbosa 1995 |
| *Limosa limosa* | 252 | 47 | 178 | invertebrates |  | 3.9 |  | Barbosa 1995 |
| *Philomachus pugnax* | 170 | 22 | 165 | invertebrates |  | 2.49 |  | Barbosa 1995 |
| *Pluvialis squatarola* | 250 | 33 | 17 | invertebrates |  | 1.33 |  | Barbosa 1995 |
| *Recurvirostra avosetta* | 304 | 48 | 146 | invertebrates |  | 4.38 |  | Barbosa 1995 |
| *Rhea americana* | 23000 | 33 | 8 | vegetation | 34.00 | 13 |  | Martella et al. 1995 |
| *Tringa totanus* | 129 | 23 | 169 | invertebrates |  | 5.16 |  | Barbosa 1995 |
| *Vanellus vanellus* | 211 | 38 | 34 | invertebrates |  | 1.94 |  | Barbosa 1995 |
| *Anser albifrons* | 2700 | 122 |  | vegetation |  | 14 | 0.5 | Gawlik and Slack 1996 |
| *Branta canadensis* | 2180 | 38 | 1000 | vegetation |  | 11.00 | 0.5 | Gawlik and Slack 1996 |
| *Chen caerulescens* | 2744 | 65 | 10000 | vegetation |  | 14.00 | 0.5 | Gawlik and Slack 1996 |
| *Junco hyemalis* | 19.3 | 26 | 7 | seeds |  |  |  | Lima and Zollner1996 |
| *Calidris alpina* | 55.4 | 77 | 189 | invertebrates |  | 1.7 |  | Barbosa 1997 |
| *Corvus brachyrhynchos* | 538 | 23 | 7 | invertebrates |  | 9.50 |  | Ward and Low 1997 |
| *Gallus gallus* | 844 | 52 | 1 | seeds | 12.70 |  |  | Burger 1997 |
| *Lonchura punctulata* | 13.6 | 6 | 5 | seeds | 62.00 | 35.00 |  | Beauchamp and Livoreil 1997 |
| *Loxia leucoptera* | 26 | 511 | 5 | seeds |  |  |  | Benkman 1997 |
| *Rhea americana* | 23000 | 65 | 26 | vegetation | 16.00 | 5 |  | Reboreda and Fernandez 1997 |
| *Calidris mauri* | 26.6 | 232 | 200 | invertebrates |  | 5 | 1 | Davis and Smith 1998 |
| *Calidris minutilla* | 22 | 288 |  | invertebrates |  | 7 | 0.2 | Davis and Smith 1998 |
| *Dromaius novaehollandiae* | 31500 | 136 | 18 | seeds | 47.00 | 47 |  | Hough et al. 1998 |
| *Limnodromus scolopaceus* | 100 | 472 | 20 | invertebrates |  | 4.2 | 0 | Davis and Smith 1998 |
| *Molothrus ater* | 48.7 | 30 | 7 | mixed |  | 7.3 | 3.3 | Morris and Thompson 1998 |
| *Parus major* | 18.9 | 15 | 1 | seeds | 98.00 |  |  | Krams 1998 |
| *Streptopelia chinensis* | 159 | 73 | 10 | seeds | 41.00 | 13 |  | Sadedin and Elgar 1998 |
| *Struthio camelus* | 111000 | 9 | 3 | seeds |  | 29.00 |  | Ross and Deeming 1998 |
| *Calidris himantopus* | 53.8 | 133 | 10 | invertebrates |  | 2 |  | de Leon and Smith 1999 |
| *Calidris minutilla* | 22 | 358 | 6 | invertebrates |  | 10.00 |  | de Leon and Smith 1999 |
| *Calidris pusilla* | 27.5 | 159 | 8 | invertebrates |  | 8 |  | de Leon and Smith 1999 |
| *Haematopus ostralegus* | 526 | 159 | 5 | invertebrates |  | 17.00 |  | Goss-Custard et al. 1999 |
| *Serinus serinus* | 11.2 | 35 | 30 | seeds |  | 63.00 |  | Domènech and Senar 1999 |
| *Anser albifrons* | 2700 | 211 | 142 | vegetation |  | 15.5 |  | Kristiansen et al. 2000 |
| *Emberiza citrinella* | 29.7 | 226 | 100 | seeds |  | 25.00 |  | van der Veen 2000 |
| *Myiopsitta monachus* | 120 | 79 | 31 | seeds | 68.00 | 20 |  | South and Pruett-Jones 2000 |
| *Numenius americanus* | 640 | 17 | 1 | invertebrates | 1.10 | 1.10 | 3.4 | Mathis 2000 |
| *Somateria mollissima* | 2218 | 117 | 22 | invertebrates |  | 25.3 | 1 | Beauchamp 2000 |
| *Anas clypeata* | 620 | 33 | 65 | mixed |  | 12 |  | Guillemain et al. 2001 |
| *Anas crecca crecca* | 320 | 47 | 23 | seeds |  | 21.00 |  | Guillemain et al. 2001 |
| *Corvus caurinus* | 415 | 571 | 80 | invertebrates | 50.00 | 20 |  | Robinette and Ha 2001 |
| *Junco hyemalis* | 19.3 | 625 | 35 | seeds | 58.00 | 15 |  | Boysen et al. 2001 |
| *Anas clypeata* | 620 | 32 | 13 | mixed |  | 8 |  | Guillemain et al. 2002 |
| *Anas penelope* | 680 | 45 | 50 | vegetation |  | 14 |  | Guillemain et al. 2002 |
| *Anas platyrhynchos* | 1082 | 12 | 12 | seeds |  | 8.30 |  | Fritz et al. 2002 |
| *Emberiza elegans* | 17 | 43 | 10 | seeds | 32.00 | 24 |  | Yamaguchi and Yahara 2002 |
| *Limosa limosa* | 252 | 535 | 30 | invertebrates | 20.00 | 10.00 |  | Dominguez 2002 |
| *Somateria mollissima* | 2218 | 233 | 3 | invertebrates | 57.00 | 40.00 |  | Ost et al. 2002 |
| *Anser albifrons* | 2700 | 58 | 6790 | seeds |  | 7.20 | 0.2 | Shimada and Shimada 2003 |
| *Anser cynoides* | 3575 | 34 | 120 | vegetation | 15.00 | 15.00 |  | Randler 2003 |
| *Branta leucopsis* | 1788 | 172 | 3374 | vegetation |  | 3.00 |  | Carbone et al. 2003 |
| *Bubulcus ibis* | 372 | 69 | 40 | invertebrates |  | 6.40 |  | Wahungu et al. 2003 |
| *Colinus virgianus* | 178 | 25 | 20 | seeds |  | 15.00 |  | Williams et al. 2003 |
| *Dromaius novaehollandiae* | 31500 | 17 | 41 | seeds | 73.70 | 9.50 |  | Boland 2003 |
| *Fringilla coelebs* | 21.9 | 39 | 1 | seeds | 70.00 |  |  | Cresswell et al. 2003 |
| *Grus grus* | 5500 | 203 | 10 | mixed |  | 19.00 |  | Aviles 2003 |
| *Patagioenas maculosa* | 309 | 30 | 20 | seeds | 66.00 | 37.00 |  | Fernàndez-Juricic and Schroeder 2003 |
| *Phoenicopterus ruber ruber* | 3540 | 26 | 100 | vegetation | 43.40 | 10.40 |  | Beauchamp and McNeil 2003 |
| *Rhea americana* | 23000 | 40 | 12 | vegetation | 12.00 | 2.00 |  | Fernandez et al. 2003 |
| *Zenaida auriculata* | 131 | 30 | 20 | seeds | 46.00 | 19.00 |  | Fernàndez-Juricic and Schroeder 2003 |
| *Fulica atra* | 902 | 25 | 80 | vegetation |  | 11.10 |  | Randler 2004 |
| *Arenaria interpres* | 134 | 15 | 16 | invertebrates |  |  | 5 | Vahl et al. 2005 |
| *Calidris canutus* | 148 | 10 | 16 | invertebrates |  |  | 3 | Vahl et al. 2005 |
| *Cygnus columbianus* | 7200 | 214 | 100 | vegetation |  | 16.90 | 0.7 | Badzinski 2005 |
| *Nettapus pulchellus* | 310 | 207 | 2 | vegetation |  | 6.50 | 1 | Nye and Dickman 2005 |
| *Anser albifrons* | 2700 | 53 | 3700 | seeds | 25.11 | 1.11 | 3.7 | Amano et al. 2006 |
| *Columbina squamata* | 52.9 | 142 | 19 | seeds | 6.67 | 1.00 |  | Dias 2006 |
| *Acridotheres tristis* | 120 | 310 | 23 | invertebrates | 15.20 | 5.70 |  | Newey 2007 |
| *Grus grus* | 5500 | 485 | 564 | mixed |  |  |  | Aviles and Bednekoff 2007 |
| *Molothrus ater* | 48.7 | 126 | 7 | seeds | 88.00 | 65.00 |  | Fernàndez-Juricic et al. 2007 |
| *Molothrus ater* | 48.7 | 56 | 8 | seeds | 71.00 | 45.00 |  | Morgan and Fernàndez-Juricic 2007 |
| *Perdix perdix* | 418 | 122 | 13 | seeds | 54.30 | 12.70 |  | Watson et al. 2007 |
| *Phoenicopterus ruber roseus* | 3540 | 117 | 350 | vegetation | 18.00 | 30.00 |  | Boukhriss et al. 2007b |
| *Phoenicopterus ruber roseus* | 3540 | 21 | 31 | vegetation | 25.79 | 4.48 | 1 | Boukhriss et al. 2007a |
| *Turdoides bicolor* | 78.3 | 84 | 11 | invertebrates |  | 14.00 |  | Radford and Ridley 2007 |
| *Miliaria calandra* | 53.6 | 137 | 60 | seeds |  | 36.40 |  | Smart et al. 2008 |
| *Spizella wortheni* | 13 | 41 | 30 | mixed |  | 54.20 |  | Canales-Delgadillo et al. 2008 |
| *Tringa totanus* | 129 | 296 | 65 | invertebrates | 40.00 | 20.00 |  | Sansom et al. 2008 |

**References**

ABRAMSON, M. 1979. Vigilance as a factor influencing flock formation among curlews *Numenius arquata*. -*Ibis,* **121**: 213-216.

ALONSO, J. A. and ALONSO, J. C. 1993. Age-related differences in time budgets and parental care in wintering common cranes. -*Auk,* **110**: 78-88.

ALONSO, J. A., ALONSO, J. C., CARRASCAL, L. M. and MUNOZPULIDO, R. 1994. Flock size and foraging decisions in central place foraging white storks, *Ciconia ciconia*. -*Behaviour,* **129**: 279-292.

AMANO, T., USHIYAMA, K., FUJITA, G. and HIGUCHI, H. 2006. Costs and benefits of flocking in foraging white-fronted geese (*Anser albifrons*): effects of resource depletion. -*J. Zool.,* **269**: 111-115.

AVILES, J. M. 2003. Time budget and habitat use of the Common Crane wintering in dehesas of southwestern Spain. -*Can. J. Zool.,* **81**: 1233-1238.

AVILES, J. M. and BEDNEKOFF, P. A. 2007. How do vigilance and feeding by common cranes *Grus grus* depend on age, habitat, and flock size? -*J. Avian Biol.,* **38**: 690-697.

BADZINSKI, S. S. 2005. Social influences on Tundra Swan activities during migration. -*Waterbirds,* **28**: 316-325.

BARBOSA, A. 1995. Foraging strategies and their influence on scanning and flocking behaviour of waders. -*J. Avian Biol.,* **26**: 182-186.

BARBOSA, A. 1997. The effects of predation risk on scanning and flocking behavior in dunlin. -*J. Field Ornithol.,* **68**: 607-612.

BARNARD, C. J. 1980. Flock feeding and time budgets in the house sparrow (*Passer domesticus* L.). -*Anim. Behav.,* **28**: 295-309.

BEAUCHAMP, G. 2000. Parental behaviour and brood integrity in amalgamated broods of the Common Eider. -*Wildfowl,* **51**: 169-179.

BEAUCHAMP, G. and LIVOREIL, B. 1997. The effect of group size on vigilance and feeding rate in spice finches (*Lonchura punctulata*). -*Can. J. Zool.,* **75**: 1526-1531.

BEAUCHAMP, G. and MCNEIL, R. 2003. Vigilance in Greater Flamingos foraging at night. -*Ethology,* **109**: 511-520.

BEKOFF, M. 1995. Vigilance, flock size, and flock geometry - Information gathering by western evening grosbeaks (Aves, Fringillidae). -*Ethology,* **99**: 150-161.

BÉLANGER, L. and BÉDARD, J. 1992. Flock composition and foraging behaviour of gretaer snow geese (*Chen caerulescens atlantica*). -*Can. J. Zool.,* **70**: 2410-2415.

BENKMAN, C. W. 1997. Feeding behavior, flock-size dynamics, and variation in sexual selection in crossbills. - *Auk,* **114**: 163-178.

BERTRAM, B. C. R. 1980. Vigilance and group size in ostriches. -*Anim. Behav.,* **28**: 278-286.

BEVERIDGE, F. M. and DEAG, J. M. 1987. The effects of sex, temperature and companions on looking up and feeding in single and mixed species flocks of house sparrows (*Passer domesticus*), chaffinches (*Fringilla coelebs*) and starlings (*Sturnus vulgaris*). -*Behaviour,* **100**: 303-320.

BILDSTEIN, K. L. 1983. Age-related differences in the flocking and foraging behavior of white ibises in a South Carolina salt marsh. -*Col. Waterbirds,* **6**: 45-53.

BLACK, J. M., CARBONE, C., WELLS, R. L. and OWEN, M. 1992. Foraging dynamics in goose flocks: the cost of living on the edge. -*Anim. Behav.,* **44**: 41-50.

BOLAND, C. R. J. 2003. An experimental test of predator detection rates using groups of free-living emus. -*Ethology,* **109**: 209-222.

BOUKHRISS, J., SELMI, S., BECHET, A. and NOUIRA, S. 2007a. Vigilance in Greater Flamingos wintering in southern Tunisia: Age-dependent flock size effect. -*Ethology,* **113**: 377-385.

BOUKHRISS, J., SELMI, S. and NOUIRA, S. 2007b. Time allocation and vigilance behaviour of Greater Flamingos (*Phoenicopterus roseus*) wintering in the Gulf of Gabes, Tunisia. -*Ostrich,* **78**: 459-461.

BOYSEN, A. F., LIMA, S. L. and BAKKEN, G. S. 2001. Does the thermal environment influence vigilance behavior in dark-eyed juncos (*Junco hyemalis*)? An approach using standard operative temperature. -*Journal of Thermal Biology,* **26**: 605-612.

BRIGGS, S. G. 1990. Sexual and annual differences in activity budgets of maned ducks *Chenonetta jubata*. -*Emu,* **90**: 190-194.

BURGER, A. E. 1982. Foraging behaviour of lesser sheathbills *Chionis minor* exploiting invertebrates on a sub-antarctic island. -*Oecologia,* **52**: 236-245.

BURGER, J. 1997. Vigilance behavior and chickens: Differences among status and location. -*Appl. Anim. Behav. Sci.,* **54**: 345-350.

BURGER, J. and GOCHFELD, M. 1988. Effects of group size and sex on vigilance in ostriches (*Struthio camelus*): antipredator strategy or mate competition? -*Ostrich,* **59**: 14-20.

BURGER, J. and GOCHFELD, M. 1991a. Human activity influence and diurnal and nocturnal foraging of sanderlings (*Calidris alba*). -*Condor,* **93**: 259-265.

BURGER, J. and GOCHFELD, M. 1991b. Vigilance and feeding behaviour in large feeding flocks of laughing gulls, *Larus atricilla*, on Delaware Bay. -*Estuarine, Coastal and Shelf Science,* **32**: 207-212.

CANALES-DELGADILLO, J. C., SCOTT-MORALES, L. M., CORREA, M. C. and MORENO, M. P. 2008. Observations on flocking behavior of Worthen's Sparrow (*Spizella wortheni*) and occurrence in mixed-species flocks. -*Wilson J. Ornithol,* **120**: 569-574.

CARACO, T. 1979. Time budgeting and group size: a test of theory. -*Ecology,* **60**: 618-627.

CARACO, T., MARTINDALE, S. and PULLIAM, H. R. 1980. Avian time budgets and distance from cover. -*Auk,* **97**: 872-875.

CARBONE, C., THOMPSON, W. A., ZADORINA, L. and ROWCLIFFE, J. M. 2003. Competition, predation risk and patterns of flock expansion in barnacle geese (*Branta leucopsis*). -*J. Zool.,* **259**: 301-308.

CARRASCAL, L. M., ALONSO, J. C. and ALONSO, J. A. 1990. Aggregation size and foraging behaviour of white storks *Ciconia ciconia* during the breeding season. -*Ardea,* **78**: 399-404.

CARRASCAL, L. M. and MORENO, E. 1992. Scanning behaviour and spatial niche. -*J. Ornithol.,* **133**: 73-77.

CRESSWELL, W., QUINN, J. L., WHITTINGHAM, M. J. and BUTLER, S. 2003. Good foragers can also be good at detecting predators. -*Proc. R. Soc. Lond. Ser. B-Biol. Sci,* **270**: 1069-1076.

DAVIS, C. A. and SMITH, L. M. 1998. Behavior of migrant shorebirds in Playas of the southern high plains, Texas. -*Condor,* **100**: 266-276.

DE LEON, M. T. and SMITH, L. M. 1999. Behavior of migrating shorebirds at North Dakota Prairie Potholes. -*Condor,* **101**: 645-654.

DIAS, R. I. 2006. Effects of position and flock size on vigilance and foraging behaviour of the scaled dove *Columbina squammata*. -*Behav. Proc.,* **73**: 248-252.

DIAZ, J. A. and ASENSIO, B. 1991. Effects of group size and distance to protective cover on the vigilance behaviour of black-billed magpies (*Pica pica*). -*Bird Study,* **38**: 38-41.

DOMÈNECH, J. and SENAR, J. C. 1999. Are foraging serin *Serinus serinus* females more vigilant than males?: The effect of sex ratio. -*Ardea,* **87**: 277-284.

DOMINGUEZ, J. 2002. Biotic and abiotic factors affecting the feeding behavior of the Black-tailed Godwit. -*Waterbirds,* **25**: 393-400.

DRENT, R. and SWIESTRA, P. 1977. Goose flocks and food finding: field experiments with barnacle geese in winter. -*Wildfowl,* **28**: 15-20.

EBBINGE, B., CANTERS, K. and DRENT, R. H. 1975. Foraging routines and estimated daily food intake in barnacle geese wintering in the northern Netherlands. -*Wildfowl,* **26**: 5-19.

EKMAN, J. 1987. Exposure and time use in willow tit flocks: the cost of subordination. -*Anim. Behav.,* **35**: 508-514.

ELCAVAGE, P. and CARACO, T. 1983. Vigilance behaviour in house sparrow flocks. -*Anim. Behav.,* **31**: 303-304.

ELGAR, M. A., BURREN, P. J. and POSEN, M. 1984. Vigilance and perception of flock size in foraging house sparrows *Passer domesticus* L. -*Behaviour,* **90**: 215-223.

ELY, C. R. 1992. Time allocation by greater white-fronted geese: influence of diet, energy reserves and predation. -*Condor,* **94**: 857-870.

FERGUSON, J. W. H. 1987. Vigilance behaviour in white-browed sparrow-weavers *Plocepasser mahali*. -*Ethology,* **76**: 223-235.

FERNÀNDEZ-JURICIC, E., BEAUCHAMP, G. and BASTAIN, B. 2007. Group-size and distance-to-neighbour effects on feeding and vigilance in brown-headed cowbirds. -*Anim. Behav.,* **73**: 771-778.

FERNÀNDEZ-JURICIC, E. and SCHROEDER, N. 2003. Do variations in scanning behavior affect tolerance to human disturbance? -*Appl. Anim. Behav. Sci.,* **84**: 219-234.

FERNANDEZ, G. J., CAPURRO, A. F. and REBOREDA, J. C. 2003. Effect of group size on individual and collective vigilance in greater rheas. -*Ethology,* **109**: 413-425.

FRITZ, H., GUILLEMAIN, M. and DURANT, D. 2002. The cost of vigilance for intake rate in the mallard (*Anas platyrhynchos*): An approach through foraging experiments. -*Ethol. Ecol. Evol.,* **14**: 91-97.

GAUTHIER, G., BÉDARD, Y. and BÉDARD, J. 1988. Habitat use and activity budgets of greater snow geese in spring. -*Journal of Wildlife Management,* **52**: 191-201.

GAWLIK, D. E. and SLACK, R. D. 1996. Comparative foraging behavior of sympatric snow geese, greater white-fronted geese, and Canada geese during the non-breeding season. -*Wilson Bull.,* **108**: 154-159.

GLÜCK, E. 1987. An experimental study of feeding, vigilance and predator avoidance in a single bird. -*Oecologia,* **71**: 268-272.

GOSS-CUSTARD, J. D., CAYFORD, J. T. and LEA, S. G. 1999. Vigilance during food handling by oystercatchers *Haematopus ostralegus* reduces the chances of losing prey to kleptoparasites. -*Ibis,* **141**: 368-376.

GUILLEMAIN, M., DUNCAN, P. and FRITZ, H. 2001. Switching to a feeding method that obstructs vision increases head-up vigilance in dabbling ducks. -*J. Avian Biol.,* **32**: 345-350.

GUILLEMAIN, M., MARTIN, G. R. and FRITZ, H. 2002. Feeding methods, visual fields and vigilance in dabbling ducks (Anatidae). -*Func. Ecol.,* **16**: 522-529.

HEGNER, R. E. 1985. Dominance and anti-predator behaviour in blue tits (*Parus caeruleus*). -*Anim. Behav.,* **33**: 762-768.

HEINSOHN, R. G. 1987. Age-dependent vigilance in winter aggregations of cooperatively breeding white-winged choughs (*Corcorax melanorhamphos*). -*Behav. Ecol. & Sociobiol.,* **20**: 303-306.

HOGSTAD, O. 1988. Advantages of social foraging of willow tits *Parus montanus*. -*Ibis,* **130**: 275-283.

HOUGH, D., WONG, B., BENNETT, G., BRETTSCHNEIDER, K., SPINNOCHIA, M., MANION, N. and HEINSOHN, R. 1998. Vigilance and group size in emus. -*Emu,* **98**: 324-327.

HUNT, H. E. 1987. The effects of burning and grazing on habitat use by Whooping Cranes and Sandhill Cranes on the Aransas National Wildlife Refuge. Texas A&M University.

INGLIS, I. R. and ISAACSON, A. J. 1978. The responses of dark-bellied brent geese (*Branta bernicla bernicla*) to models of geese in various postures. -*Anim. Behav.,* **26**: 953-958.

INGLIS, I. R. and LAZARUS, J. 1981. Vigilance and flock size in brent geese: the edge effect. -*Zeitschrift fur Tierpsychologie,* **57**: 193-200.

JENNINGS, T. and EVANS, S. M. 1980. Influence of position in the flock and flock size on vigilance in the starling, *Sturnus vulgaris*. -*Anim. Behav.,* **28**: 634-635.

JORDE, D. G., KRAPU, G. L. and CRAWFORD, R. D. 1983. Feeding ecology of Mallards wintering in Nebraska. -*Journal of Wildlife Management,* **47**: 1044-1053.

KNIGHT, S. K. and KNIGHT, R. L. 1986. Vigilance patterns in bald eagles feeding in groups. -*Auk,* **103**: 263-272.

KOTRSCHAL, K., HEMETSBERGER, J. and DITTAMI, J. 1993. Food exploitation by a winter flock of greylag geese: behavioral dynamics, competition and social status. -*Behav. Ecol. & Sociobiol.,* **33**: 289-295.

KRAMS, I. 1998. Dominance-specific vigilance in the great tit. -*J. Avian Biol.,* **29**: 55-60.

KRISTIANSEN, J. N., FOX, A. D., BOYD, H. and STROUD, D. A. 2000. Greenland white-fronted geese *Anser albifrons flavivostris* benefit from feeding in mixed-species flocks. -*Ibis,* **142**: 142-144.

LAZARUS, J. 1978. Vigilance, flock size and domain of danger in the white-fronted goose. -*Wildfowl,* **29**: 135-145.

LAZARUS, J. and INGLIS, I. R. 1978. The breeding behaviour of the pink-footed goose: parental care and vigilant behaviour during the feeding period. -*Behaviour,* **65**: 62-88.

LENDREM, D. W. 1984. Flocking, feeding and predation risk: absolute and instantaneous feeding rates. -*Anim. Behav.,* **32**: 298-299.

LIMA, S. L. 1987. Distance to cover, visual obstructions, and vigilance in house sparrows. -*Behaviour,* **102**: 231-238.

LIMA, S. L. 1995. Back to the basics of anti-predatory vigilance: the group-size effect. -*Anim. Behav.,* **49**: 11-20.

MARTELLA, M. B., RENISON, D. and NAVARRO, J. L. 1995. Vigilance in the greater rhea: effect of vegetation height and group size. -*J. Field Ornithol.,* **66**: 215-220.

MATHIS, R. L. 2000. Analysis of Long-billed Curlews (*Numenius americanus*) distributions at three special scales.Humboldt State University, Arcata.

MCKINSTRY, M. C. and KNIGHT, R. L. 1993. Foraging ecology of wintering black-billed magpies. -*Auk,* **110**: 632-635.

MCVEAN, A. and HADDLESEY, P. 1980. Vigilance schedules among house sparrows Passer domesticus. -*Ibis,* **122**: 533-536.

MILLIGAN, B. N. and BRIGHAM, R. M. 1992. The influence of group size on vigilance in captive-raised ring-necked pheasants. -*Condor,* **94**: 787-790.

MORENO, E. and CARRASCAL, M. 1991. Patch residence time and vigilance in birds foraging at feeders: implications of bill shape. -*Ethol. Ecol. Evol.,* **3**: 345-350.

MORGAN, T. and FERNÀNDEZ-JURICIC, E. 2007. The effects of predation risk, food abundance, and population size on group size of brown-headed cowbirds (*Molothrus ater*). -*Ethology,* **113**: 1173-1184.

MORRIS, D. L. and THOMPSON, F. R. 1998. Effects of habitat and invertebrate density on abundance and foraging behavior of brown-headed cowbirds. -*Auk,* **115**: 376-385.

MOURITSEN, K. N. 1992. Predator avoidance in night feeding dunlins Calidris alpina: a matter of concealment. -*Ornis Scand.,* **23**: 195-198.

NEWEY, P. 2007. Foraging behaviour of the Common Myna (*Acridotheres tristis*) in relation to vigilance and group size. -*Emu,* **107**: 315-320.

NYE, E. R. and DICKMAN, C. R. 2005. Activity budgets and habitat use of the green pygmy-goose (Nettapus pulchellus) on dry-season refuges in Kakadu National Park, Northern Territory. -*Emu,* **105**: 217-222.

OST, M., MANTILA, L. and KILPI, M. 2002. Shared care provides time-budgeting advantages for female eiders. -*Anim. Behav.,* **64**: 223-231.

OWEN, M. 1972. Some factors affecting food intake and selection in white-fronted geese. -*J. Anim. Ecol.,* **41**: 79-92.

PAULUS, S. L. 1984. Activity budgets of non-breeding gadwalls in Louisiana. -*Journal of Wildlife Management,* **48**: 371-380.

PAULUS, S. L. 1988. Time-activity budgets of mottled ducks in Louisiana in winter. -*Journal of Wildlife Management,* **52**: 711-718.

PETIT, D. R. and BILDSTEIN, K. L. 1987. Effect of group size and location within the group on the foraging behavior of white ibises. -*Condor,* **89**: 602-609.

POWELL, G. V. N. 1974. Experimental analysis of the social value of flocking by starlings (*Sturnus vulgaris*) in relation to predation and foraging. -*Anim. Behav.,* **22**: 501-505.

PÖYSÄ, H. 1994. Group foraging, distance to cover and vigilance in the teal, *Anas crecca*. -*Anim. Behav.,* **48**: 921-928.

RADFORD, A. N. and RIDLEY, A. R. 2007. Individuals in foraging groups may use vocal cues when assessing their need for anti-predator vigilance. -*Biol. Lett,* **3**: 249-252.

RANDLER, C. 2003. Vigilance in urban Swan Geese and their hybrids. -*Waterbirds,* **26**: 257-260.

RANDLER, C. 2004. Coot benefit from feeding in close proximity to geese. -*Waterbirds,* **27**: 240-244.

REBOREDA, J. C. and FERNANDEZ, G. J. 1997. Sexual, seasonal and group size differences in the allocation of time between vigilance and feeding in the greater rhea, *Rhea americana*. -*Ethology,* **103**: 198-207.

REDPATH, S. 1988. Vigilance levels in preening dunlin *Calidris alpina*. -*Ibis,* **130**: 213-216.

ROBINETTE, R. L. and HA, J. C. 2001. Social and ecological factors influencing vigilance by northwestern crows, *Corvus caurinus*. -*Anim. Behav.,* **62**: 447-452.

ROSS, E. J. and DEEMING, D. C. 1998. Feeding and vigilance behaviour of breeding ostriches (*Struthio camelus*) in a farming environment in Britain. -*British Poultry Science,* **39**: 173-177.

SADEDIN, S. R. and ELGAR, M. A. 1998. The influence of flock size and geometry on the scanning behaviour of spotted turtle doves, Streptopelia chinensis. -*Australian Journal of Ecology,* **23**: 177-180.

SAINO, N. 1994. Time budget variation in relation to flock size in carrion crows, *Corvus corone corone*. -*Anim. Behav.,* **47**: 1189-1196.

SANSOM, A., CRESSWELL, W., MINDERMAN, J. and LIND, J. 2008. Vigilance benefits and competition costs in groups: do individual redshanks gain an overall foraging benefit? -*Anim. Behav.,* **75**: 1869-1875.

SCHMITZ, R. A. and BALDASSARRE, G. A. 1992. Correlates of flock size and behavior of foraging American flamingos following hurricane Gilbert in Yucatan, Mexico. -*Condor,* **94**: 260-264.

SHIMADA, T. and SHIMADA, K. 2003. Factors affecting vigilance in greater white-fronted geese *Anser albifrons*. -*Wildfowl,* **54**: 201-218.

SMART, S. L., STILLMAN, R. A. and NORRIS, K. J. 2008. Measuring the functional responses of farmland birds: an example for a declining seed-feeding bunting. -*J. Anim. Ecol.,* **77**: 687-695.

SOUTH, J. M. and PRUETT-JONES, S. 2000. Patterns of flock size, diet, and vigilance of naturalized monk parakeets in Hyde Park, Chicago. -*Condor,* **102**: 848-854.

SPARLING, D. W. and KRAPU, G. L. 1994. Communal roosting and foraging behavior of staging sandhill cranes. -*Wilson Bull.,* **106**: 62-77.

STUDD, M., MONTGOMERIE, R. D. and ROBERTSON, R. J. 1983. Group size and predator surveillance in foraging house sparrows (*Passer domesticus*). -*Can. J. Zool.,* **61**: 226-231.

SULLIVAN, K. A. 1984. The advantages of social foraging in downy woodpeckers. -*Anim. Behav.,* **32**: 16-22.

TACHA, T. C. 1989. Social organization of Sandhill cranes from midcontinental North America. -*Wildl. Monogr.,* **99**.

TURNBULL, R. E. and BALDASSARE, G. A. 1987. Activity budgets of mallards and American wigeons wintering in east-central Alabama. -*Wilson Bull.,* **99**: 457-464.

VAHL, W. K., VAN DER MEER, J., WEISSING, F. J., VAN DULLEMEN, D. and PIERSMA, T. 2005. The mechanisms of interference competition: two experiments on foraging waders. -*Behav. Ecol.,* **16**: 845-855.

VAN DER VEEN, I. T. 2000. Daily routines and predator encounters in Yellowhammers *Emberiza citrinella* in the field during winter. -*Ibis,* **142**: 413-420.

WAHUNGU, G. M., MUMIA, E. N. and MANOA, D. 2003. The effects of flock size, habitat type and cattle herd sizes on feeding and vigilance in cattle egrets (*Ardeola ibis*). -*Afr. J. Ecol.,* **41**: 287-288.

WAITE, R. K. 1981. Local enhancement for food finding by rooks (*Corvus frugilegus*) foraging on grassland. -*Z. Tierpsychol.,* **57**: 15-36.

WARD, C. and LOW, B. S. 1997. Predictors of vigilance for American crows foraging in an urban environment. -*Wilson Bull.,* **109**: 481-489.

WATSON, M., AEBISCHER, N. J. and CRESSWELL, W. 2007. Vigilance and fitness in grey partridges *Perdix perdix*: the effects of group size and foraging-vigilance trade-offs on predation mortality. -*J. Anim. Ecol.,* **76**: 211-221.

WESTCOTT, D. A. and COCKBURN, A. 1988. Flock size and vigilance in parrots. -*Australian J. Zool.,* **36**: 335-349.

WILLIAMS, C. K., LUTZ, R. S. and APPLEGATE, R. D. 2003. Optimal group size and northern bobwhite coveys. -*Anim. Behav.,* **66**: 377-387.

YAMAGUCHI, N. and YAHARA, T. 2002. Factors causing variation in flock size: Decision making to join a foraging flock. -*Ecological Research,* **17**: 361-371.

YOUNG, A. D. 1989. Spacing behaviour of visual- and tactile-feeding shorebirds in mixed-species groups. -*Can. J. Zool.,* **67**: 2026-2028.
